# Supplementary material
Source: PubMed Central journal article supplement (PMC4654616)
Supplement: NIHMS720223-supplement-01.pdf [file NIHMS720223-supplement-01.pdf]

1  
2  
3  
4  
5  
6  
7  
8  
9  
10  
11  
12  
13  
14  
15

Scheme S1 Structure of fragments used in the substructure cheminformatics search

Figure S1. **(a)** Fluorescence polarization (mP) for FAM-AE147 and uPAR measured at increasing concentration of 12 candidate compounds. **(b)** An ELISA was used to measure inhibition of uPAR binding to uPA<sub>ATF</sub>-coated microtiter plate by serial dilutions of 12 candidate compounds.

## Scheme S1

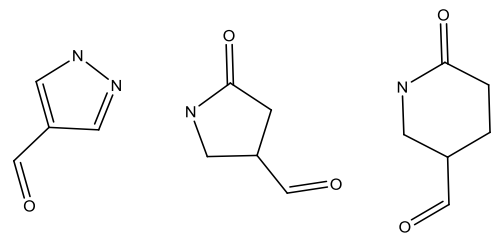

10  
11 Fragments used in substructure search that led to **1**

1  
2  
3  
4  
5  
6  
7  
8  
9  
10  
11  
12  
13  
14  
15  
16  
17  
18  
19  
20  
21  
22  
23  
24  
25  
26  
27  
28  
29  
30  
31  
32  
33  
34  
35  
36  
37  
38  
39  
40  
41  
42  
43

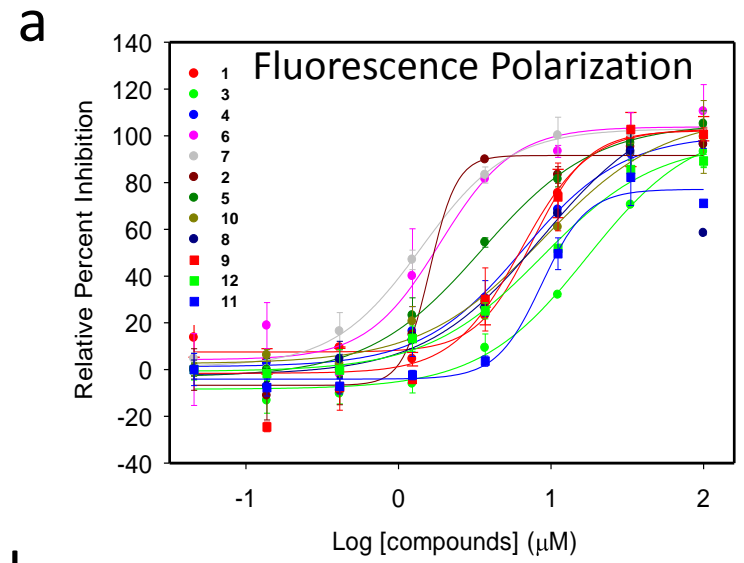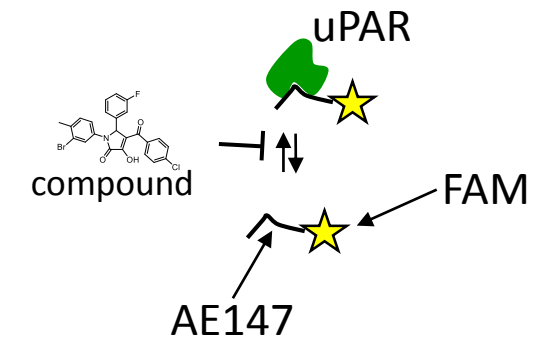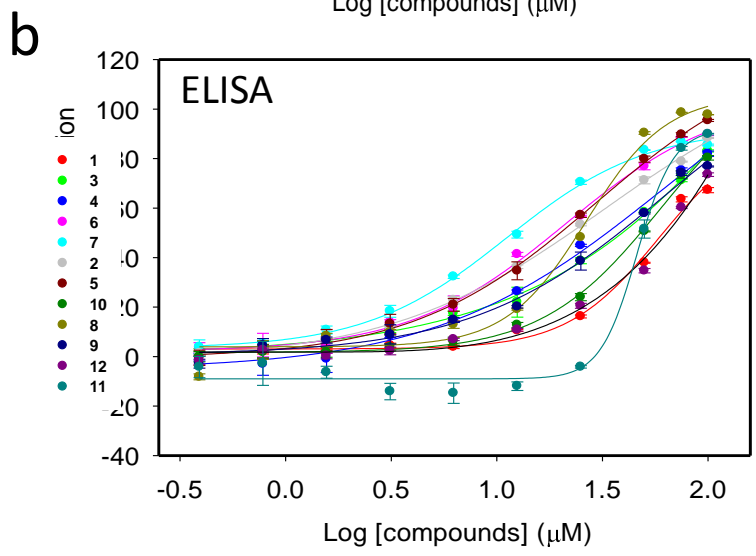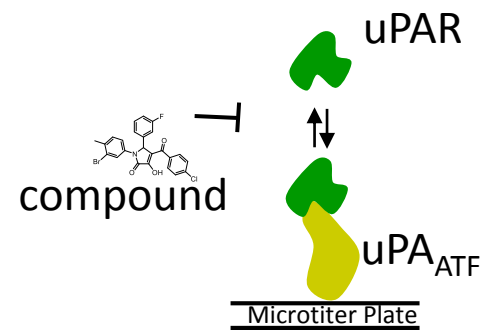

**(a)** Fluorescence polarization (mP) for FAM-AE147 and uPAR measured at increasing concentration of compounds. Error bars represent means  $\pm$  S.D. **(b)** An ELISA was used to measure inhibition of uPAR binding to uPA<sub>ATF</sub>-coated microtiter plate by serial dilutions of compounds. Error bars represent means  $\pm$  S.D.
